# Supplementary material
Source: Springer Nature journal article supplement (https://www.springermedizin.de/resource/supplementary/13058_2014_3422_MOESM4_ESM.pdf/9704134)

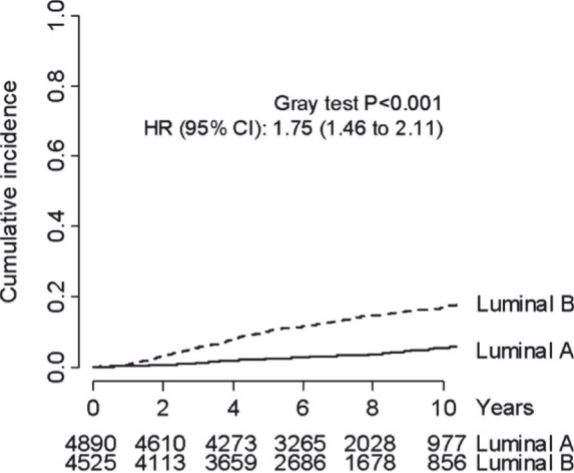

**Patients (10-year cumulative incidence)**

Luminal A<sup>New</sup> 4890 ( 5.5%)

Luminal B<sup>New</sup> 4525 (17.1%)

Supplement: MOESM4 [file 9704134]
